# Supplementary material for: A model based on the quantification of complement C4c, CYFRA 21–1 and CRP exhibits high specificity for the early diagnosis of lung cancer
Source: PubMed Central journal article supplement — Transl Res. Author manuscript; Available in PMC 2022 Mar 18. (PMC8931205; doi:10.1016/j.trsl.2021.02.009), 2021-02-19
Supplement: NIHMS1675899-supplement-2.pdf [file NIHMS1675899-supplement-2.pdf]

**Supplementary Table 1.** Demographics and plasma levels of C4c in early stage lung cancer patients (n=39) and control individuals (n=39) from Clinica Universidad de Navarra

| Characteristics         | Control subjects |             |                      | Lung cancer patients |               |                      |
|-------------------------|------------------|-------------|----------------------|----------------------|---------------|----------------------|
|                         | n                | C4c (AU)*   | P value <sup>†</sup> | n                    | C4c (AU)*     | P value <sup>†</sup> |
| <b>Sex</b>              |                  |             |                      |                      |               |                      |
| Female                  | 5                | 81 (66-89)  | 0.801                | 5                    | 146 (134-178) | 0.614                |
| Male                    | 34               | 87 (69-108) |                      | 34                   | 174 (104-211) |                      |
| <b>Age (years)</b>      |                  |             |                      |                      |               |                      |
| ≤65                     | 22               | 85 (62-96)  | 0.282                | 19                   | 155 (112-198) | 0.354                |
| >65                     | 17               | 87 (78-111) |                      | 20                   | 181 (118-212) |                      |
| <b>Smoking status</b>   |                  |             |                      |                      |               |                      |
| Never                   |                  |             |                      | 1                    | 155           |                      |
| Former                  | 27               | 87 (63-109) | 0.831                | 25                   | 168 (100-211) | 0.882                |
| Current                 | 12               | 85 (79-91)  |                      | 13                   | 173 (138-196) |                      |
| <b>Pack-years</b>       |                  |             |                      |                      |               |                      |
| ≤35                     | 18               | 82 (69-106) | 0.888                | 17                   | 173 (146-184) | 0.918                |
| >35                     | 21               | 88 (63-108) |                      | 21                   | 178 (117-211) |                      |
| Unknown                 |                  |             |                      | 1                    | 97            |                      |
| <b>Histology</b>        |                  |             |                      |                      |               |                      |
| ADC                     |                  |             |                      | 19                   | 161 (100-186) | 0.431                |
| SCC                     |                  |             |                      | 20                   | 178 (114-225) |                      |
| <b>Nodule size (cm)</b> |                  |             |                      |                      |               |                      |
| ≤2.5                    |                  |             |                      | 17                   | 146 (104-175) | 0.019                |
| >2.5                    |                  |             |                      | 22                   | 191 (138-239) |                      |
| <b>Stage</b>            |                  |             |                      |                      |               |                      |
| I                       |                  |             |                      | 31                   | 160 (112-198) | 0.251                |
| II                      |                  |             |                      | 8                    | 189 (138-242) |                      |
| <b>Status</b>           |                  |             |                      |                      |               |                      |
| Alive                   |                  |             |                      | 28                   | 176 (125-205) | 0.915                |
| Death                   |                  |             |                      | 9                    | 173 (117-206) |                      |
| Unknown                 |                  |             |                      | 2                    | 117 (108-126) |                      |

\*Data are expressed as median (25th to 75th percentiles) AU: arbitrary units. <sup>†</sup>Two-sided Mann-Whitney U test.

**Supplementary Table 2.** Demographics and plasma levels of C4d in early stage lung cancer patients (n=39) and control individuals (n=39) from Clinica Universidad de Navarra\*

| Characteristics         | Control subjects |                       |                      | Lung cancer patients |                       |                      |
|-------------------------|------------------|-----------------------|----------------------|----------------------|-----------------------|----------------------|
|                         | n                | C4d (AU) <sup>†</sup> | P value <sup>‡</sup> | n                    | C4d (AU) <sup>†</sup> | P value <sup>‡</sup> |
| <b>Sex</b>              |                  |                       |                      |                      |                       |                      |
| Female                  | 5                | 0.46 (0.39-0.77)      | 0.585                | 5                    | 1.04 (0.88-1.65)      | 0.966                |
| Male                    | 34               | 0.58 (0.52-0.65)      |                      | 34                   | 0.95 (0.69-1.61)      |                      |
| <b>Age (years)</b>      |                  |                       |                      |                      |                       |                      |
| ≤65                     | 22               | 0.57 (0.46-0.61)      | 0.336                | 19                   | 0.89 (0.65-1.43)      | 0.536                |
| >65                     | 17               | 0.59 (0.53-0.66)      |                      | 20                   | 1.02 (0.72-1.84)      |                      |
| <b>Smoking status</b>   |                  |                       |                      |                      |                       |                      |
| Never                   |                  |                       |                      | 1                    | 0.69                  |                      |
| Former                  | 27               | 0.58 (0.52-0.66)      | 0.287                | 25                   | 1.16 (0.70-2.06)      | 0.444                |
| Current                 | 12               | 0.54 (0.44-0.63)      |                      | 13                   | 0.86 (0.78-1.08)      |                      |
| <b>Pack-years</b>       |                  |                       |                      |                      |                       |                      |
| ≤35                     | 18               | 0.59 (0.48-0.73)      | 0.284                | 17                   | 1.04 (0.8-1.43)       | 0.284                |
| >35                     | 21               | 0.55 (0.52-0.61)      |                      | 21                   | 0.86 (0.68-1.68)      |                      |
| Unknown                 |                  |                       |                      | 1                    | 0.58                  |                      |
| <b>Histology</b>        |                  |                       |                      |                      |                       |                      |
| ADC                     |                  |                       |                      | 19                   | 0.88 (0.69-2.06)      | 0.757                |
| SCC                     |                  |                       |                      | 20                   | 1.05 (0.70-1.52)      |                      |
| <b>Nodule size (cm)</b> |                  |                       |                      |                      |                       |                      |
| ≤2.5                    |                  |                       |                      | 17                   | 0.88 (0.52-1.43)      | 0.213                |
| >2.5                    |                  |                       |                      | 22                   | 1.1 (0.73-1.66)       |                      |
| <b>Stage</b>            |                  |                       |                      |                      |                       |                      |
| I                       |                  |                       |                      | 31                   | 0.88 (0.68-1.68)      | 0.626                |
| II                      |                  |                       |                      | 8                    | 1.05 (0.90-1.51)      |                      |
| <b>Status</b>           |                  |                       |                      |                      |                       |                      |
| Alive                   |                  |                       |                      | 28                   | 0.96 (0.67-1.43)      | 0.896                |
| Death                   |                  |                       |                      | 9                    | 1.01 (0.78-1.61)      |                      |
| Unknown                 |                  |                       |                      | 2                    | 1.4 (1.07-1.73)       |                      |

\*These data were previously obtained and have been already published: Ajona D, Okrój M, Pajares MJ, et al. Complement C4d-specific antibodies for the diagnosis of lung cancer. *Oncotarget*. 2017; 9: 6346-6355.

<sup>†</sup>Data are expressed as median (25th to 75th percentiles) AU: arbitrary units. <sup>‡</sup>Two-sided Mann-Whitney U test.

**Supplementary Table 3.** Demographics and plasma levels of C4d-containing fragments in early stage lung cancer patients (n=39) and control individuals (n=39) from Clinica Universidad de Navarra\*

| Characteristics         | Control subjects |                                    |          | Lung cancer patients |                                    |          |
|-------------------------|------------------|------------------------------------|----------|----------------------|------------------------------------|----------|
|                         | n                | C4d-containing fragments (µg/ml) † | P value‡ | n                    | C4d-containing fragments (µg/ml) † | P value‡ |
| <b>Sex</b>              |                  |                                    |          |                      |                                    |          |
| Female                  | 5                | 0.75 (0.74-0.8)                    | 0.737    | 5                    | 0.75 (0.71-0.87)                   | 0.172    |
| Male                    | 34               | 0.69 (0.61-0.93)                   |          | 34                   | 0.87 (0.75-1.12)                   |          |
| <b>Age (years)</b>      |                  |                                    |          |                      |                                    |          |
| ≤65                     | 22               | 0.75 (0.62-0.89)                   | 0.977    | 19                   | 0.79 (0.71-0.94)                   | 0.129    |
| >65                     | 17               | 0.66 (0.62-0.94)                   |          | 20                   | 0.91 (0.81-1.14)                   |          |
| <b>Smoking status</b>   |                  |                                    |          |                      |                                    |          |
| Never                   |                  |                                    |          | 1                    | 0.82                               |          |
| Former                  | 27               | 0.68 (0.61-0.91)                   | 0.361    | 25                   | 0.93 (0.78-1.13)                   | 0.530    |
| Current                 | 12               | 0.73 (0.65-0.95)                   |          | 13                   | 0.8 (0.71-0.93)                    |          |
| <b>Pack-years</b>       |                  |                                    |          |                      |                                    |          |
| ≤35                     | 18               | 0.77 (0.63-0.91)                   | 0.652    | 17                   | 0.93 (0.79-1.04)                   | 0.567    |
| >35                     | 21               | 0.7 (0.61-0.92)                    |          | 21                   | 0.87 (0.70-1.19)                   |          |
| Unknown                 |                  |                                    |          | 1                    | 0.74                               |          |
| <b>Histology</b>        |                  |                                    |          |                      |                                    |          |
| ADC                     |                  |                                    |          | 19                   | 0.82 (0.73-1.02)                   | 0.222    |
| SCC                     |                  |                                    |          | 20                   | 0.9 (0.80-1.23)                    |          |
| <b>Nodule size (cm)</b> |                  |                                    |          |                      |                                    |          |
| ≤2.5                    |                  |                                    |          | 17                   | 0.82 (0.72-0.94)                   | 0.229    |
| >2.5                    |                  |                                    |          | 22                   | 0.93 (0.78-1.12)                   |          |
| <b>Stage</b>            |                  |                                    |          |                      |                                    |          |
| I                       |                  |                                    |          | 31                   | 0.82 (0.73-0.95)                   | 0.044    |
| II                      |                  |                                    |          | 8                    | 1.11 (0.9-1.32)                    |          |
| <b>Status</b>           |                  |                                    |          |                      |                                    |          |
| Alive                   |                  |                                    |          | 28                   | 0.82 (0.71-0.93)                   | 0.012    |
| Death                   |                  |                                    |          | 9                    | 1.25 (1.04-1.75)                   |          |
| Unknown                 |                  |                                    |          | 2                    | 0.99 (0.93-1.05)                   |          |

\*These data have been obtained from a subset of patients from a cohort in which the determination of C4d-containing fragments were already performed and published: Ajona D, Pajares MJ, Corrales L, et al. Investigation of complement activation product C4d as a diagnostic and prognostic biomarker for lung cancer. J Natl Cancer Inst. 2013; 105: 1385-1393.

†Data are expressed as median (25th to 75th percentiles). ‡Two-sided Mann-Whitney U test.

**Supplementary Table 4.** Plasma levels of cancer biomarkers in early stage lung cancer patients (n=39) and control individuals (n=39) from Clinica Universidad de Navarra

| <b>Marker</b>        | <b>Control subjects*</b> | <b>Lung cancer patients*</b> | <b>P value<sup>†</sup></b> | <b>Adjusted P value<sup>‡</sup></b> |
|----------------------|--------------------------|------------------------------|----------------------------|-------------------------------------|
| AFP (ng/ml)          | 1.42 (1.09-1.98)         | 1.48 (1.14-2.11)             | 0.893                      | 0.954                               |
| Total PSA (ng/ml)    | 0.40 (0.17-1.49)         | 0.33 (0.09-0.89)             | 0.475                      | 0.954                               |
| CA15.3 (U/ml)        | 11.89 (6.22-15.80)       | 9.76 (6.70-15.72)            | 0.549                      | 0.954                               |
| CA19.9 (U/ml)        | 19.73 (13.99-27.90)      | 19.55 (14.03-25.58)          | 0.877                      | 0.954                               |
| MIF (ng/ml)          | 1.16 (0.73-2.09)         | 0.88 (0.55-1.69)             | 0.124                      | 0.620                               |
| TRAIL (ng/ml)        | 0.17 (0.12-0.19)         | 0.17 (0.12-0.21)             | 0.916                      | 0.954                               |
| Leptin (ng/ml)       | 15.41 (8.88-39.89)       | 22.24 (9.99-35.87)           | 0.586                      | 0.954                               |
| IL-6 (pg/ml)         | 4.29 (2.92-5.95)         | 5.62 (4.29-8.23)             | 0.022                      | 0.137                               |
| sFasL (pg/ml)        | 22.55 (11.70-29.82)      | 15.30 (11.70-26.18)          | 0.455                      | 0.954                               |
| CEA (ng/ml)          | 1.05 (0.53-1.76)         | 0.90 (0.50-1.78)             | 0.738                      | 0.954                               |
| CA125 (U/ml)         | 4.59 (3.57-6.14)         | 5.10 (4.07-7.19)             | 0.319                      | 0.944                               |
| IL-8 (pg/ml)         | 4.83 (3.44-5.76)         | 5.14 (3.90-7.48)             | 0.254                      | 0.944                               |
| HGF (ng/ml)          | 0.20 (0.16-0.28)         | 0.23 (0.19-0.26)             | 0.340                      | 0.944                               |
| sFas (ng/ml)         | 2.00 (1.71-2.64)         | 1.98 (1.54-2.37)             | 0.463                      | 0.954                               |
| TNF $\alpha$ (pg/ml) | 8.53 (7.36-10.09)        | 8.53 (7.18-10.65)            | 0.996                      | 0.996                               |
| Prolactin (ng/ml)    | 8.62 (4.98-11.01)        | 11.01 (7.18-15.95)           | 0.003                      | 0.033                               |
| SCF (pg/ml)          | 48.76 (37.65-59.83)      | 50.98 (37.65-70.86)          | 0.569                      | 0.954                               |
| CYFRA21.1 (ng/ml)    | 0.99 (0-2.20)            | 3.86 (1.42-5.03)             | <0.001                     | 0.002                               |
| OPN (ng/ml)          | 42.42 (36.43-54.65)      | 55.72 (33.94-72.61)          | 0.310                      | 0.944                               |
| FGF2 (ng/ml)         | 0.12 (0.10-0.17)         | 0.12 (0.10-0.17)             | 0.798                      | 0.954                               |
| bHCG (mU/ml)         | 0                        | 0                            | 0.864                      | 0.954                               |
| HE4 (ng/ml)          | 4.94 (3.08-5.50)         | 4.94 (3.74-5.50)             | 0.860                      | 0.954                               |
| TGF $\alpha$ (ng/ml) | 0                        | 0                            | 0.890                      | 0.954                               |
| VEGF (pg/ml)         | 0                        | 0                            | 0.847                      | 0.954                               |
| CRP ( $\mu$ g/ml)    | 1.80 (0.90-3.30)         | 4.10 (1.90-15.30)            | 0.004                      | 0.033                               |

\*Data are expressed as median (25th to 75th percentiles). <sup>†</sup>Two-sided Mann-Whitney U test. <sup>‡</sup>FDR-adjusted P values (Benjamini-Hochberg method)

**Supplementary Table 5.** Simple logistic regression for the evaluation of C4c, prolactin, CYFRA 21.1 and CRP as potential diagnostic markers for lung cancer using the case-control set of samples from Clinica Universidad de Navarra

| <b>Marker</b> | <b>LR chi<sup>2</sup></b> | <b>P value*</b> |
|---------------|---------------------------|-----------------|
| C4c           | 39.18                     | <0.001          |
| IL-6          | 1.80                      | 0.180           |
| Prolactin     | 7.40                      | 0.006           |
| CYFRA 21.1    | 24.38                     | <0.001          |
| CRP           | 14.52                     | <0.001          |

\*The likelihood ratio chi-square (LR chi<sup>2</sup>) test was used to evaluate the goodness of fit of the markers

**Supplementary Table 6.** C4c-containing lung cancer diagnostic models generated by logistic regression using combinations of C4c plasma levels and plasma levels of prolactin, CYFRA 21.1 and/or CRP in lung cancer patients (n=39) and control subjects (n=39) from Clinica Universidad de Navarra

| Biomarker/s             | Diagnostic parameters* |                 |              |            |            |                    |                  |
|-------------------------|------------------------|-----------------|--------------|------------|------------|--------------------|------------------|
|                         | Sensitivity (%)        | Specificity (%) | Accuracy (%) | PPV (%)    | NPV (%)    | LR+                | LR-              |
| C4c                     | 72 (55-85)             | 95 (83-99)      | 83 (73-91)   | 93 (78-98) | 77 (67-85) | 14.00 (3.58-54.78) | 0.30 (0.18-0.49) |
| C4c+prolactin           | 77 (61-89)             | 95 (83-99)      | 86 (76-93)   | 94 (79-98) | 80 (70-88) | 15.00 (3.85-58.49) | 0.24 (0.14-0.43) |
| C4c+CYFRA               | 82 (66-92)             | 95 (82-99)      | 88 (79-95)   | 94 (80-98) | 84 (72-91) | 15.59 (4.01-60.55) | 0.19 (0.10-0.37) |
| C4c+CRP                 | 77 (61-89)             | 95 (83-99)      | 86 (76-93)   | 94 (79-98) | 80 (70-88) | 15.00 (3.85-58.49) | 0.24 (0.14-0.43) |
| C4c+prolactin+CYFRA     | 82 (66-92)             | 92 (79-98)      | 87 (77-94)   | 91 (78-97) | 84 (72-91) | 10.39 (3.47-31.09) | 0.19 (0.10-0.38) |
| C4c+prolactin+CRP       | 77 (61-89)             | 95 (83-99)      | 86 (76-93)   | 94 (79-98) | 80 (70-88) | 15.00 (3.85-58.49) | 0.24 (0.14-0.43) |
| C4c+CYFRA+CRP           | 82 (66-92)             | 95 (82-99)      | 88 (79-95)   | 94 (80-98) | 84 (72-91) | 15.59 (4.01-60.55) | 0.19 (0.10-0.37) |
| C4c+prolactin+CYFRA+CRP | 79 (64-91)             | 95 (82-99)      | 87 (77-94)   | 94 (80-98) | 82 (71-89) | 15.10 (3.88-58.75) | 0.22 (0.12-0.40) |

\*Diagnostic statistics were calculated at the maximum Youden index in each model. PPV: positive predictive value; NPV: negative predictive value; LR+: positive likelihood ratio; LR-: negative likelihood ratio.

**Supplementary Table 7.** Comparison of the performance of the diagnostic model based on C4c, CYFRA 21-1 and CRP with the performance of a model without C4c

| <b>Model</b>  | <b>LR chi2</b> | <b>P value*</b> |
|---------------|----------------|-----------------|
| C4c/CYFRA/CRP | 52.05          | <0.001          |
| CYFRA/CRP     | 27.94          |                 |

\*Values from the likelihood ratio chi-square test obtained in the two diagnostic models were compared using the likelihood-ratio test

| <b>Diagnostic parameters*</b> | <b>C4c/CYFRA/CRP</b> | <b>CYFRA/CRP</b> |
|-------------------------------|----------------------|------------------|
| Sensitivity (%)               | 82 (66-92)           | 74 (58-87)       |
| Specificity (%)               | 95 (82-99)           | 79 (63-90)       |
| Accuracy (%)                  | 88 (79-95)           | 77 (66-86)       |
| Positive predictive value (%) | 94 (80-98)           | 78 (66-87)       |
| Negative predictive value (%) | 84 (72-91)           | 75 (63-84)       |
| Positive likelihood ratio     | 15.59 (4.01-60.55)   | 3.53 (1.86-6.72) |
| Negative likelihood ratio     | 0.19 (0.10-0.37)     | 0.32 (0.19-0.57) |

\*Diagnostic parameters were calculated at the maximum Youden index

**Supplementary Table 8.** Association between the probabilities of malignancy obtained from the multivariate model based on C4c/CYFRA 21-1/CRP plasma levels, and the demographic and clinical characteristics of lung cancer patients (n=39) and matched controls (n=38) from Clinica Universidad de Navarra

| Characteristics         | Controls |                  |                      | Cases |                  |                      |
|-------------------------|----------|------------------|----------------------|-------|------------------|----------------------|
|                         | n        | Probability*     | P value <sup>†</sup> | n     | Probability*     | P value <sup>†</sup> |
| <b>Sex</b>              |          |                  |                      |       |                  |                      |
| Female                  | 5        | 0.14 (0.11-0.33) | 0.983                | 5     | 0.83 (0.60-0.89) | 0.166                |
| Male                    | 33       | 0.15 (0.11-0.31) |                      | 34    | 0.95 (0.74-0.99) |                      |
| <b>Age (years)</b>      |          |                  |                      |       |                  |                      |
| ≤65                     | 22       | 0.12 (0.06-0.25) | 0.029                | 19    | 0.90 (0.63-0.99) | 0.399                |
| >65                     | 16       | 0.27 (0.14-0.35) |                      | 20    | 0.96 (0.78-0.99) |                      |
| <b>Smoking status</b>   |          |                  |                      |       |                  |                      |
| Never smoker            |          |                  | 0.826                | 1     | 0.83             | 0.860                |
| Ex-smoker               | 26       | 0.17 (0.08-0.32) |                      | 25    | 0.95 (0.66-0.99) |                      |
| Current smoker          | 12       | 0.13 (0.11-0.31) |                      | 13    | 0.92 (0.72-0.99) |                      |
| <b>Pack-years</b>       |          |                  |                      |       |                  |                      |
| ≤35                     | 17       | 0.16 (0.11-0.35) | 0.258                | 17    | 0.92 (0.83-0.99) | 0.362                |
| >35                     | 21       | 0.13 (0.11-0.27) |                      | 21    | 0.94 (0.72-0.99) |                      |
| Unknown                 |          |                  |                      | 1     | 0.20             |                      |
| <b>Histology</b>        |          |                  |                      |       |                  |                      |
| ADC                     |          |                  |                      | 19    | 0.83 (0.50-0.95) | 0.012                |
| SCC                     |          |                  |                      | 20    | 0.99 (0.87-1.00) |                      |
| <b>Nodule size (cm)</b> |          |                  |                      |       |                  |                      |
| ≤2.5                    |          |                  |                      | 17    | 0.80 (0.57-0.90) | 0.003                |
| >2.5                    |          |                  |                      | 22    | 0.98 (0.92-1.00) |                      |
| <b>Stage</b>            |          |                  |                      |       |                  |                      |
| I                       |          |                  |                      | 31    | 0.90 (0.63-0.99) | 0.186                |
| II                      |          |                  |                      | 8     | 0.97 (0.89-1.00) |                      |
| <b>Status</b>           |          |                  |                      |       |                  |                      |
| Alive                   |          |                  |                      | 28    | 0.91 (0.71-0.99) | 0.020                |
| Death                   |          |                  |                      | 9     | 1.00 (0.97-1.00) |                      |
| Unknown                 |          |                  |                      | 2     | 0.40 (0.31-0.48) |                      |

\*Data are expressed as median (25th to 75th percentiles). <sup>†</sup>Two-sided Mann-Whitney U test.



**Supplementary Table 9.** Demographics and their association with the probabilities of malignancy obtained from the multivariate model based on C4c/CYFRA 21.1/CRP plasma levels in control individuals (n=49) and advanced NSCLC patients (n=50) from Clinica Universidad de Navarra

| <b>Characteristics</b> | <b>Control subjects</b> |                     |                            | <b>Lung cancer patients</b> |                     |                            |
|------------------------|-------------------------|---------------------|----------------------------|-----------------------------|---------------------|----------------------------|
|                        | <b>n</b>                | <b>Probability*</b> | <b>P value<sup>†</sup></b> | <b>n</b>                    | <b>Probability*</b> | <b>P value<sup>†</sup></b> |
| <b>Sex</b>             |                         |                     |                            |                             |                     |                            |
| Female                 | 11                      | 0.24 (0.20-0.68)    | 0.443                      | 11                          | 0.52 (0.37-0.93)    | 0.114                      |
| Male                   | 38                      | 0.24 (0.17-0.39)    |                            | 39                          | 0.75 (0.45-0.99)    |                            |
| <b>Age (years)</b>     |                         |                     |                            |                             |                     |                            |
| ≤65                    | 31                      | 0.22 (0.19-0.30)    | 0.097                      | 32                          | 0.71 (0.38-0.96)    | 0.558                      |
| >65                    | 18                      | 0.35 (0.20-0.42)    |                            | 18                          | 0.75 (0.45-0.99)    |                            |
| <b>Smoking status</b>  |                         |                     |                            |                             |                     |                            |
| Former                 | 24                      | 0.29 (0.19-0.44)    | 0.379                      | 31                          | 0.77 (0.55-0.99)    | 0.095                      |
| Current                | 25                      | 0.24 (0.19-0.32)    |                            | 19                          | 0.62 (0.36-0.91)    |                            |
| <b>Pack-years</b>      |                         |                     |                            |                             |                     |                            |
| ≤35                    | 19                      | 0.22 (0.19-0.44)    | 0.697                      | 15                          | 0.46 (0.38-0.75)    | 0.043                      |
| >35                    | 30                      | 0.29 (0.19-0.39)    |                            | 35                          | 0.77 (0.62-0.99)    |                            |
| <b>Histology</b>       |                         |                     |                            |                             |                     |                            |
| ADC                    |                         |                     |                            | 39                          | 0.71 (0.38-0.93)    | 0.237                      |
| SCC                    |                         |                     |                            | 11                          | 0.97 (0.55-0.99)    |                            |
| <b>Stage</b>           |                         |                     |                            |                             |                     |                            |
| III                    |                         |                     |                            | 21                          | 0.66 (0.37-0.99)    | 0.731                      |
| IV                     |                         |                     |                            | 29                          | 0.75 (0.45-0.95)    |                            |

\*Data are expressed as median (25th to 75th percentiles). <sup>†</sup>Two-sided Mann-Whitney U test.

**Supplementary Table 10.** Demographics and their association with the probabilities of malignancy obtained from the multivariate model based on C4c/CYFRA 21.1/CRP plasma levels in control individuals (n=48) and SCLC patients (n=47) from the biobank of the University of Navarra

| <b>Characteristics</b> | <b>Control subjects</b> |                     |                            | <b>Lung cancer patients</b> |                     |                            |
|------------------------|-------------------------|---------------------|----------------------------|-----------------------------|---------------------|----------------------------|
|                        | <b>n</b>                | <b>Probability*</b> | <b>P value<sup>†</sup></b> | <b>n</b>                    | <b>Probability*</b> | <b>P value<sup>†</sup></b> |
| <b>Sex</b>             |                         |                     |                            |                             |                     |                            |
| Female                 | 12                      | 0.44 (0.35-0.53)    | 0.505                      | 11                          | 0.47 (0.37-0.64)    | 0.327                      |
| Male                   | 36                      | 0.42 (0.34-0.48)    |                            | 36                          | 0.53 (0.41-0.66)    |                            |
| <b>Age (years)</b>     |                         |                     |                            |                             |                     |                            |
| ≤65                    | 30                      | 0.42 (0.34-0.50)    | 0.983                      | 35                          | 0.53 (0.39-0.66)    | 0.558                      |
| >65                    | 18                      | 0.41 (0.34-0.51)    |                            | 12                          | 0.50 (0.45-0.70)    |                            |
| <b>Smoking status</b>  |                         |                     |                            |                             |                     |                            |
| Former                 | 20                      | 0.41 (0.31-0.48)    | 0.478                      | 21                          | 0.49 (0.39-0.66)    | 0.982                      |
| Current                | 26                      | 0.42 (0.38-0.51)    |                            | 24                          | 0.54 (0.40-0.66)    |                            |
| Unknown                | 2                       | 0.48 (0.47-0.49)    |                            | 2                           | 0.44 (0.42-0.47)    |                            |
| <b>Pack-years</b>      |                         |                     |                            |                             |                     |                            |
| ≤35                    | 30                      | 0.41 (0.34-0.50)    | 0.475                      | 14                          | 0.52 (0.43-0.66)    | 0.579                      |
| >35                    | 16                      | 0.44 (0.35-0.51)    |                            | 30                          | 0.53 (0.39-0.67)    |                            |
| Unknown                | 2                       | 0.48 (0.47-0.49)    |                            | 3                           | 0.43 (0.42-0.47)    |                            |
| <b>Stage</b>           |                         |                     |                            |                             |                     |                            |
| Limited                |                         |                     |                            | 10                          | 0.57 (0.37-0.66)    | 0.790                      |
| Extensive              |                         |                     |                            | 32                          | 0.52 (0.40-0.73)    |                            |
| Unknown                |                         |                     |                            | 5                           | 0.48 (0.47-0.49)    |                            |

\*Data are expressed as median (25th to 75th percentiles). <sup>†</sup>Two-sided Mann-Whitney U test.

**Supplementary Table 11.** Demographics and their association with the probabilities of malignancy obtained from the multivariate model based on C4c/CYFRA 21.1/CRP plasma levels in a screened population of asymptomatic individuals from Clinica Universidad de Navarra (n=93 for controls, and n=30 for lung cancer cases)

| Characteristics         | Control subjects |                  |                      | Lung cancer patients |                  |                      |
|-------------------------|------------------|------------------|----------------------|----------------------|------------------|----------------------|
|                         | n                | Probability*     | P value <sup>†</sup> | n                    | Probability*     | P value <sup>†</sup> |
| <b>Sex</b>              |                  |                  |                      |                      |                  |                      |
| Female                  | 10               | 0.16 (0.15-0.21) | 0.191                | 4                    | 0.33 (0.21-0.43) | 0.714                |
| Male                    | 83               | 0.20 (0.16-0.28) |                      | 26                   | 0.30 (0.24-0.38) |                      |
| <b>Age (years)</b>      |                  |                  |                      |                      |                  |                      |
| ≤65                     | 63               | 0.20 (0.14-0.28) | 0.987                | 22                   | 0.29 (0.24-0.39) | 0.707                |
| >65                     | 30               | 0.19 (0.17-0.25) |                      | 8                    | 0.35 (0.23-0.38) |                      |
| <b>Smoking status</b>   |                  |                  |                      |                      |                  |                      |
| Former                  | 54               | 0.20 (0.15-0.28) | 0.691                | 13                   | 0.31 (0.27-0.39) | 0.414                |
| Current                 | 39               | 0.19 (0.16-0.27) |                      | 17                   | 0.29 (0.22-0.38) |                      |
| <b>Pack-years</b>       |                  |                  |                      |                      |                  |                      |
| ≤35                     | 29               | 0.17 (0.14-0.25) | 0.046                | 8                    | 0.26 (0.19-0.28) | 0.083                |
| >35                     | 64               | 0.21 (0.17-0.28) |                      | 22                   | 0.34 (0.27-0.39) |                      |
| <b>Histology</b>        |                  |                  |                      |                      |                  |                      |
| ADC                     |                  |                  |                      | 20                   | 0.29 (0.23-0.38) | 0.320                |
| SCC                     |                  |                  |                      | 4                    | 0.38 (0.29-0.45) |                      |
| LCC                     |                  |                  |                      | 4                    | 0.30 (0.22-0.37) |                      |
| Carcinoid               |                  |                  |                      | 1                    | 0.10             |                      |
| Anaplastic              |                  |                  |                      | 1                    | 0.39             |                      |
| <b>Nodule size (cm)</b> |                  |                  |                      |                      |                  |                      |
| ≤1.5                    |                  |                  |                      | 17                   | 0.30 (0.27-0.38) | 0.438                |
| >1.5                    |                  |                  |                      | 11                   | 0.28 (0.10-0.43) |                      |
| Unknown                 |                  |                  |                      | 2                    | 0.33 (0.27-0.39) |                      |
| <b>Stage</b>            |                  |                  |                      |                      |                  |                      |
| I                       |                  |                  |                      | 24                   | 0.29 (0.20-0.41) | 0.678                |
| II/III/IV               |                  |                  |                      | 6                    | 0.31 (0.29-0.37) |                      |

\*Data are expressed as median (25th to 75th percentiles). <sup>†</sup>Two-sided Mann-Whitney U test, or two-sided Kruskal-Wallis test.

**Supplementary Table 12.** Demographics and their association with the probabilities of malignancy obtained from the multivariate model based on C4c/CYFRA 21.1/CRP plasma levels in a screened population of asymptomatic individuals from Clinica Universidad de Navarra who do not meet the 55 to 74 years old, and at least 30 pack-years NLST selection criteria (n=36 for controls, and n=13 for lung cancer cases)

| <b>Characteristics</b>  | <b>Control subjects</b> |                     |                            | <b>Lung cancer patients</b> |                     |                            |
|-------------------------|-------------------------|---------------------|----------------------------|-----------------------------|---------------------|----------------------------|
|                         | <b>n</b>                | <b>Probability*</b> | <b>P value<sup>†</sup></b> | <b>n</b>                    | <b>Probability*</b> | <b>P value<sup>†</sup></b> |
| <b>Sex</b>              |                         |                     |                            |                             |                     |                            |
| Female                  | 8                       | 0.16 (0.15-0.20)    | 0.790                      | 3                           | 0.27 (0.21-0.37)    | 0.866                      |
| Male                    | 28                      | 0.19 (0.163-0.24)   |                            | 10                          | 0.30 (0.27-0.42)    |                            |
| <b>Age (years)</b>      |                         |                     |                            |                             |                     |                            |
| ≤65                     | 23                      | 0.16 (0.13-0.25)    | 0.270                      | 9                           | 0.29 (0.27-0.43)    | 0.877                      |
| >65                     | 13                      | 0.19 (0.19-0.22)    |                            | 4                           | 0.33 (0.23-0.41)    |                            |
| <b>Smoking status</b>   |                         |                     |                            |                             |                     |                            |
| Former                  | 20                      | 0.17 (0.15-0.22)    | 0.949                      | 8                           | 0.35 (0.28-0.44)    | 0.242                      |
| Current                 | 16                      | 0.19 (0.13-0.24)    |                            | 5                           | 0.27 (0.09-0.29)    |                            |
| <b>Pack-years</b>       |                         |                     |                            |                             |                     |                            |
| ≤35                     | 20                      | 0.17 (0.14-0.23)    | 0.464                      | 6                           | 0.27 (0.19-0.28)    | 0.199                      |
| >35                     | 16                      | 0.19 (0.15-0.23)    |                            | 7                           | 0.39 (0.30-0.44)    |                            |
| <b>Histology</b>        |                         |                     |                            |                             |                     |                            |
| ADC                     |                         |                     |                            | 7                           | 0.29 (0.27-0.42)    | 0.345                      |
| SCC                     |                         |                     |                            | 1                           | 0.46                |                            |
| LCC                     |                         |                     |                            | 4                           | 0.30 (0.25-0.34)    |                            |
| Carcinoid               |                         |                     |                            | 1                           | 0.09                |                            |
| <b>Nodule size (cm)</b> |                         |                     |                            |                             |                     |                            |
| ≤1.5                    |                         |                     |                            | 6                           | 0.34 (0.28-0.44)    | 0.580                      |
| >1.5                    |                         |                     |                            | 6                           | 0.30 (0.14-0.40)    |                            |
| Unknown                 |                         |                     |                            | 1                           | 0.27                |                            |
| <b>Stage</b>            |                         |                     |                            |                             |                     |                            |
| I                       |                         |                     |                            | 10                          | 0.33 (0.19-0.44)    | 0.735                      |
| II/III/IV               |                         |                     |                            | 3                           | 0.29 (0.28-0.30)    |                            |

\*Data are expressed as median (25th to 75th percentiles). <sup>†</sup>Two-sided Mann-Whitney U test, or two-sided Kruskal-Wallis test.

**Supplementary Table 13.** Demographics and their association with the probabilities of malignancy obtained from the multivariate model based on C4c/CYFRA 21.1/CRP plasma levels in patients with benign or malignant indeterminate pulmonary nodules (n=62 and n=76, respectively) from Vanderbilt University Medical Center

| Characteristics           | Benign lung nodules |                    |                      | Malignant lung nodules |                    |                      |
|---------------------------|---------------------|--------------------|----------------------|------------------------|--------------------|----------------------|
|                           | n                   | Probability score* | P value <sup>†</sup> | n                      | Probability score* | P value <sup>†</sup> |
| <b>Sex</b>                |                     |                    |                      |                        |                    |                      |
| Female                    | 26                  | 0.30 (0.13-0.51)   | 0.887                | 26                     | 0.82 (0.42-0.95)   | 0.467                |
| Male                      | 36                  | 0.30 (0.22-0.39)   |                      | 50                     | 0.83 (0.57-0.99)   |                      |
| <b>Age (years)</b>        |                     |                    |                      |                        |                    |                      |
| ≤65                       | 46                  | 0.31 (0.21-0.41)   | 0.987                | 33                     | 0.88 (0.46-0.99)   | 0.509                |
| >65                       | 16                  | 0.26 (0.18-0.48)   |                      | 43                     | 0.79 (0.57-0.97)   |                      |
| <b>Smoking status</b>     |                     |                    |                      |                        |                    |                      |
| Never                     | 16                  | 0.41 (0.22-0.56)   | 0.226                | 2                      | 0.65 (0.62-0.68)   | 0.375                |
| Former                    | 24                  | 0.30 (0.21-0.39)   |                      | 42                     | 0.80 (0.50-0.96)   |                      |
| Current                   | 22                  | 0.25 (0.20-0.34)   |                      | 32                     | 0.91 (0.53-1.00)   |                      |
| <b>Pack-years</b>         |                     |                    |                      |                        |                    |                      |
| ≤35                       | 32                  | 0.31 (0.21-0.49)   | 0.414                | 17                     | 0.72 (0.62-0.85)   | 0.601                |
| >35                       | 30                  | 0.27 (0.20-0.39)   |                      | 59                     | 0.83 (0.50-0.99)   |                      |
| <b>COPD</b>               |                     |                    |                      |                        |                    |                      |
| No                        | 38                  | 0.31 (0.20-0.46)   | 0.866                | 18                     | 0.86 (0.36-0.98)   | 0.775                |
| Yes                       | 22                  | 0.27 (0.20-0.39)   |                      | 54                     | 0.82 (0.58-0.99)   |                      |
| Unknown                   | 2                   | 0.41 (0.32-0.51)   |                      | 4                      | 0.60 (0.40-0.80)   |                      |
| <b>Nodule size (cm)</b>   |                     |                    |                      |                        |                    |                      |
| ≤2.5                      | 42                  | 0.29 (0.22-0.46)   | 0.972                | 26                     | 0.49 (0.30-0.79)   | <0.001               |
| >2.5                      | 16                  | 0.35 (0.20-0.43)   |                      | 50                     | 0.90 (0.70-1.00)   |                      |
| Unknown                   | 4                   | 0.23 (0.13-0.40)   |                      |                        |                    |                      |
| <b>Upper lobe nodule</b>  |                     |                    |                      |                        |                    |                      |
| No                        | 27                  | 0.36 (0.22-0.49)   | 0.415                | 32                     | 0.82 (0.44-0.99)   | 0.883                |
| Yes                       | 30                  | 0.29 (0.20-0.39)   |                      | 44                     | 0.82 (0.57-0.98)   |                      |
| Unknown                   | 5                   | 0.31 (0.27-0.32)   |                      |                        |                    |                      |
| <b>Nodule spiculation</b> |                     |                    |                      |                        |                    |                      |
| No                        | 50                  | 0.29 (0.20-0.44)   | 0.817                | 49                     | 0.83 (0.59-1.00)   | 0.346                |
| Yes                       | 12                  | 0.31 (0.16-0.41)   |                      | 25                     | 0.79 (0.50-0.96)   |                      |
| Unknown                   |                     |                    |                      | 2                      | 0.17 (0.11-0.23)   |                      |
| <b>Histology</b>          |                     |                    |                      |                        |                    |                      |
| ADC                       |                     |                    |                      | 26                     | 0.82 (0.50-0.95)   | 0.669                |
| SCC                       |                     |                    |                      | 16                     | 0.87 (0.50-1.00)   |                      |
| LCC                       |                     |                    |                      | 6                      | 0.62 (0.35-1.00)   |                      |
| NSCLC NOS                 |                     |                    |                      | 13                     | 0.88 (0.72-0.98)   |                      |
| SCLC                      |                     |                    |                      | 15                     | 0.63 (0.41-1.00)   |                      |
| <b>Stage NSCLC</b>        |                     |                    |                      |                        |                    |                      |
| I/II                      |                     |                    |                      | 17                     | 0.83 (0.35-0.95)   | 0.272                |
| III/IV                    |                     |                    |                      | 40                     | 0.83 (0.62-0.99)   |                      |
| Unknown                   |                     |                    |                      | 4                      | 0.81 (0.55-0.91)   |                      |
| <b>Stage SCLC</b>         |                     |                    |                      |                        |                    |                      |
| Limited                   |                     |                    |                      | 8                      | 0.52 (0.27-0.80)   | 0.064                |
| Extensive                 |                     |                    |                      | 7                      | 0.94 (0.50-1.00)   |                      |

\*Data are expressed as median (25th to 75th percentiles). <sup>†</sup>Two-sided Mann-Whitney U test, or Two-sided Kruskal-Wallis test.

**Supplementary Table 14.** Summary of the diagnostic performance of the protein model based on C4c/CYFRA 21.1/CRP plasma levels in combination with three different clinical models for the prediction of lung nodule malignancy in patients with benign and malignant indeterminate pulmonary nodules from Vanderbilt University Medical Center

Gould model

(58 patients with benign and 76 patients with malignant indeterminate pulmonary nodules)

| <b>Diagnostic parameters*</b> | <b>Protein model</b> | <b>Gould model</b> | <b>Combined model</b> |
|-------------------------------|----------------------|--------------------|-----------------------|
| Sensitivity (%)               | 70 (58-80)           | 87 (77-94)         | 76 (65-85)            |
| Specificity (%)               | 93 (83-98)           | 72 (59-83)         | 91 (81-97)            |
| Accuracy (%)                  | 80 (72-86)           | 81 (73-87)         | 83 (75-89)            |
| Positive predictive value (%) | 93 (84-97)           | 80 (73-86)         | 92 (83-96)            |
| Negative predictive value (%) | 70 (62-77)           | 81 (70-88)         | 75 (66-82)            |
| Positive likelihood ratio     | 10.11 (3.88-26.33)   | 3.15 (2.06-4.82)   | 8.85 (3.79-20.65)     |
| Negative likelihood ratio     | 0.33 (0.23-0.46)     | 0.18 (0.10-0.33)   | 0.26 (0.17-0.39)      |

\*Diagnostic parameters were calculated at the maximum Youden index. 95% CIs are also shown.

Mayo model

(48 patients with benign and 65 patients with malignant indeterminate pulmonary nodules)

| <b>Diagnostic parameters*</b> | <b>Protein model</b> | <b>Mayo model</b> | <b>Combined model</b> |
|-------------------------------|----------------------|-------------------|-----------------------|
| Sensitivity (%)               | 78 (67-88)           | 91 (81-96)        | 78 (67-88)            |
| Specificity (%)               | 90 (77-97)           | 65 (49-78)        | 94 (83-99)            |
| Accuracy (%)                  | 83 (75-90)           | 80 (71-87)        | 85 (77-91)            |
| Positive predictive value (%) | 91 (82-96)           | 78 (70-84)        | 94 (85-98)            |
| Negative predictive value (%) | 75 (66-83)           | 84 (70-92)        | 76 (67-84)            |
| Positive likelihood ratio     | 7.53 (3.25-17.44)    | 2.56 (1.74-3.78)  | 12.55 (4.17-37.83)    |
| Negative likelihood ratio     | 0.24 (0.15-0.39)     | 0.14 (0.06-0.32)  | 0.23 (0.14-0.37)      |

\*Diagnostic parameters were calculated at the maximum Youden index. 95% CIs are also shown.

Brock model

(55 patients with benign and 74 patients with malignant indeterminate pulmonary nodules)

| <b>Diagnostic parameters*</b> | <b>Protein model</b> | <b>Brock model</b> | <b>Combined model</b> |
|-------------------------------|----------------------|--------------------|-----------------------|
| Sensitivity (%)               | 72 (60-82)           | 77 (66-86)         | 77 (66-86)            |
| Specificity (%)               | 95 (85-99)           | 67 (53-79)         | 89 (78-96)            |
| Accuracy (%)                  | 81 (74-88)           | 73 (64-80)         | 82 (74-88)            |
| Positive predictive value (%) | 95 (85-98)           | 76 (68-83)         | 90 (82-95)            |
| Negative predictive value (%) | 71 (63-78)           | 69 (58-77)         | 74 (65-82)            |
| Positive likelihood ratio     | 13.13 (4.33-39.83)   | 2.35 (1.58-3.51)   | 7.06 (3.28-15.18)     |
| Negative likelihood ratio     | 0.30 (0.21-0.43)     | 0.34 (0.22-0.54)   | 0.26 (0.17-0.40)      |

\*Diagnostic parameters were calculated at the maximum Youden index. 95% CIs are also shown.
